# Supplementary material for: From BiF3to BiF3·H2O: diverse Bi(iii) coordination for structural transformation and birefringence regulation
Source: Royal Society of Chemistry journal article supplement (doi:10.1039/d0ce01213k), 2020-01-01
Supplement: d0ce01213k1.pdf [file d0ce01213k1.pdf]

# From $\text{BiF}_3$ to $\text{BiF}_3 \cdot \text{H}_2\text{O}$ : Diverse Bi(III) Coordination for Structural transformation and Birefringence Regulation

Xian Liu <sup>a</sup>, Can Yang <sup>a</sup>, Qi Wu <sup>a\*</sup>, Juan Sun <sup>a</sup>, Fei Liang <sup>b\*</sup>

**a.** College of Chemistry and Chemical Engineering, Hubei Normal University, Huangshi 435002, P. R. China.

**b.** State key Laboratory of crystal Materials and Institute of Crystal Materials, Shandong University, Jinan 250100, P. R. China.

## Contents

**Table S1.** Selected bond lengths (Å) for  $\text{BiF}_3 \cdot \text{H}_2\text{O}$

**Table S2.** Selected bond angles (°) for  $\text{BiF}_3 \cdot \text{H}_2\text{O}$

**Figure S1.** Simulated and measured powder X-ray diffraction patterns of  $\text{BiF}_3 \cdot \text{H}_2\text{O}$

**Figure S2.** The TGA and DSC of  $\text{BiF}_3 \cdot \text{H}_2\text{O}$

**Figure S3.** Calculated band structure by PBE functional of orthogonal  $\text{BiF}_3$ , (a) without spin-orbital coupling and (b) with spin-orbital coupling.

**Figure S4.** The simulated refractive index of  $\text{KBi}_4\text{F}_{13}$

**Table S1.** Selected bond lengths (Å) for BiF<sub>3</sub>·H<sub>2</sub>O

| bond                | lengths (Å) | bond                 | lengths (Å) |
|---------------------|-------------|----------------------|-------------|
| Bi1-F1 <sup>3</sup> | 2.456(6)    | Bi1-F1 <sup>7</sup>  | 2.456(6)    |
| Bi1-F1 <sup>4</sup> | 2.409(3)    | Bi1-F1 <sup>8</sup>  | 2.456(6)    |
| Bi1-F1 <sup>5</sup> | 2.456(6)    | Bi1-F1 <sup>9</sup>  | 2.456(6)    |
| Bi1-F1 <sup>6</sup> | 2.409(3)    | Bi1-F1 <sup>10</sup> | 2.456(6)    |
| Bi1-F1              | 2.409(3)    |                      |             |

<sup>1</sup>+X,+Y,-1+Z; <sup>2</sup>+X,+Y,1+Z; <sup>3</sup>-Y+X,+X,1/2+Z; <sup>4</sup>1-Y,1+X-Y,+Z; <sup>5</sup>+Y-X,1-X,1/2-Z; <sup>6</sup>1-X,1-Y,-Z; <sup>7</sup>+Y,1-X+Y,-Z; <sup>8</sup>-Y+X,+X,-1/2+Z; <sup>9</sup>1-X,1-Y,1-Z; <sup>10</sup>+Y,1-X+Y,1-Z

**Table S2.** Selected bond angles (°) for BiF<sub>3</sub>·H<sub>2</sub>O

| bond                                  | angles (°) | bond                                  | angles (°) |
|---------------------------------------|------------|---------------------------------------|------------|
| F1 <sup>4</sup> -Bi1-F1 <sup>7</sup>  | 69.9(3)    | F1-Bi1-F1 <sup>6</sup>                | 69.9(3)    |
| F1 <sup>3</sup> -Bi1-F1 <sup>9</sup>  | 69.6(3)    | F1 <sup>7</sup> -Bi1-F1 <sup>3</sup>  | 141.54(13) |
| F1 <sup>7</sup> -Bi1-F1 <sup>9</sup>  | 141.53(13) | F1 <sup>10</sup> -Bi1-F1 <sup>6</sup> | 141.53(13) |
| F1 <sup>10</sup> -Bi1-F1 <sup>7</sup> | 97.6(3)    | F1 <sup>10</sup> -Bi1-F1 <sup>3</sup> | 69.6(3)    |
| F1 <sup>10</sup> -Bi1-F1 <sup>9</sup> | 69.6(3)    | F1 <sup>7</sup> -Bi1-F1 <sup>6</sup>  | 69.6(3)    |
| F1 <sup>4</sup> -Bi1-F1 <sup>8</sup>  | 131.19(17) | F1 <sup>5</sup> -Bi1-F1 <sup>8</sup>  | 69.9(3)    |
| F1 <sup>5</sup> -Bi1-F1               | 120.001(2) | F1 <sup>8</sup> -Bi1-F1 <sup>6</sup>  | 69.6(3)    |
| F1 <sup>5</sup> -Bi1-F1 <sub>4</sub>  | 119.999(1) | F1 <sup>8</sup> -Bi1-F1 <sup>3</sup>  | 97.6(3)    |
| F1 <sup>5</sup> -Bi1-F1 <sup>6</sup>  | 131.19(16) | F1 <sup>3</sup> -Bi1-F1 <sup>6</sup>  | 141.53(13) |
| F1 <sup>5</sup> -Bi1-F1 <sup>3</sup>  | 69.9(3)    | F1 <sup>5</sup> -Bi1-F1 <sup>7</sup>  | 71.6(3)    |
| F1-Bi1-F1 <sup>8</sup>                | 71.6(3)    | F1 <sup>9</sup> -Bi1-F1 <sup>6</sup>  | 97.6(3)    |

|                                       |            |                                       |            |
|---------------------------------------|------------|---------------------------------------|------------|
| F1 <sup>4</sup> -Bi1-F1 <sup>3</sup>  | 131.19(17) | F1 <sup>5</sup> -Bi1-F1 <sup>9</sup>  | 131.19(16) |
| F1 <sup>4</sup> -Bi1-F1               | 120.000(2) | F1 <sup>10</sup> -Bi1-F1 <sup>8</sup> | 141.54(13) |
| F1 <sup>5</sup> -Bi1-F1 <sup>10</sup> | 71.6(3)    | F1 <sup>7</sup> -Bi1-F18              | 69.6(3)    |
| F1 <sup>8</sup> -Bi1-F1 <sup>9</sup>  | 141.53(13) | F1 <sup>4</sup> -Bi1-F1 <sup>6</sup>  | 71.6(3)    |
| F1-Bi1-F110                           | 131.19(16) | F14-Bi1-F19                           | 71.6(3)    |
| F14-Bi1-F110                          | 69.9(3)    | F1-Bi1-F17                            | 131.19(16) |
| F1-Bi1-F19                            | 69.9(3)    |                                       |            |

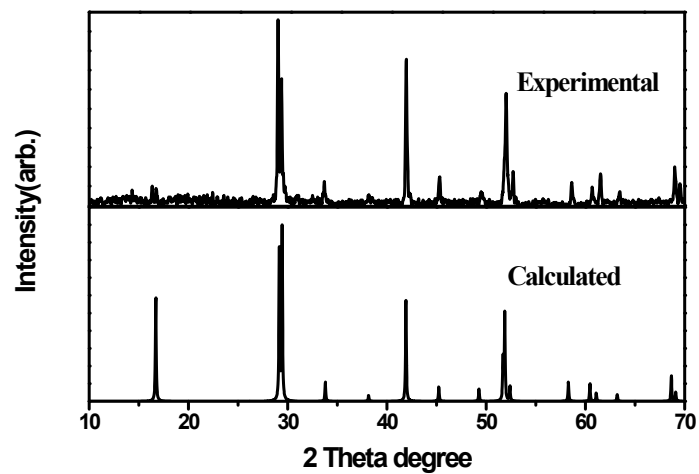

**Fig. S1** Simulated and measured powder X-ray diffraction patterns of BiF<sub>3</sub>·H<sub>2</sub>O

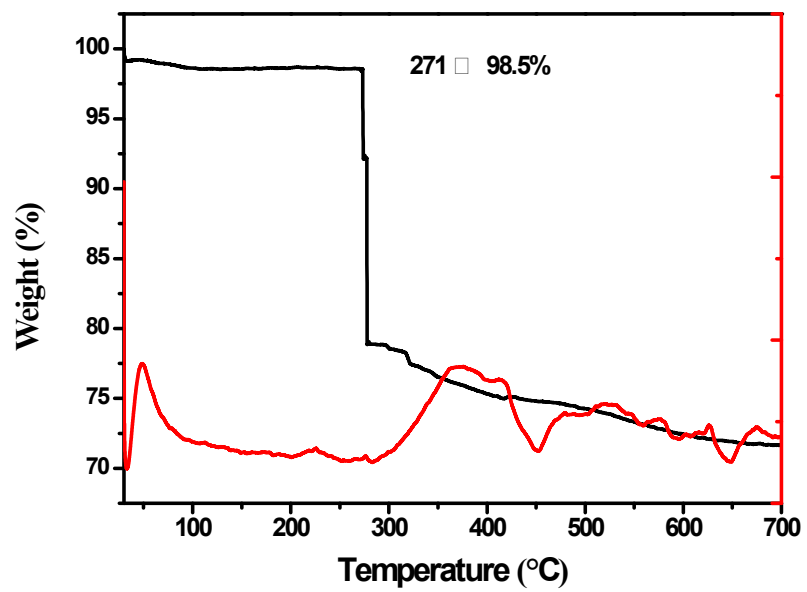

**Fig. S2** The TGA and DSC of  $\text{BiF}_3 \cdot \text{H}_2\text{O}$

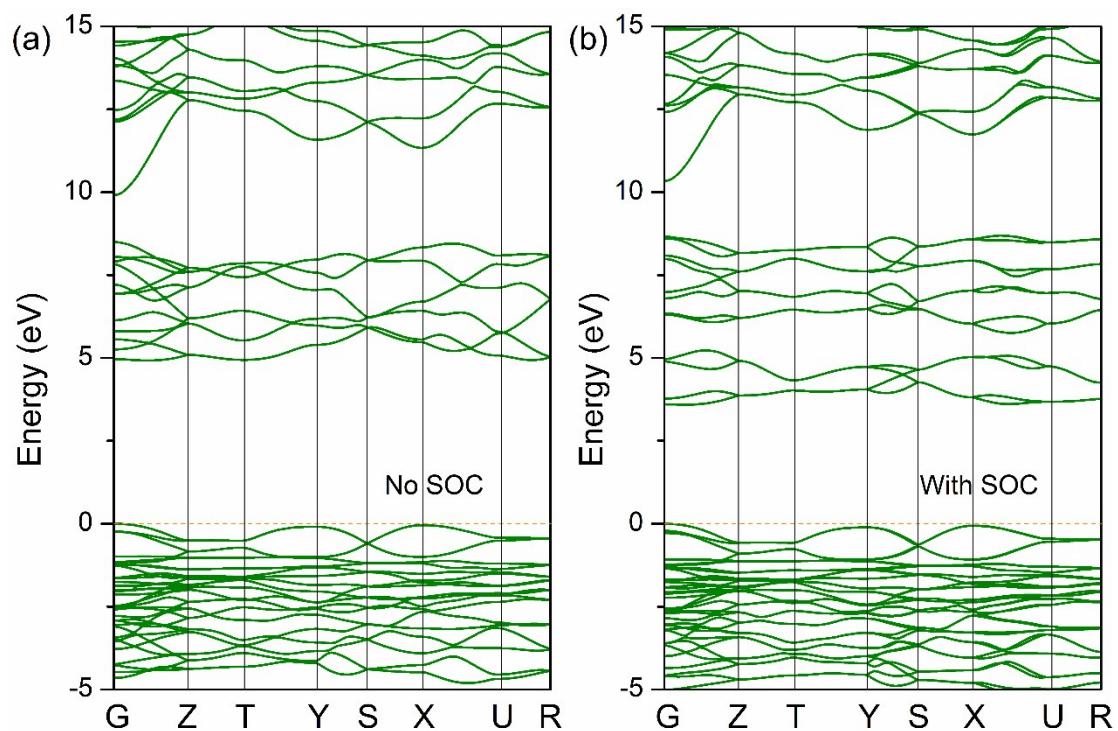

**Fig. S3** Calculated band structure by PBE functional of orthogonal  $\text{BiF}_3$ , (a) without spin-orbital coupling and (b) with spin-orbital coupling.

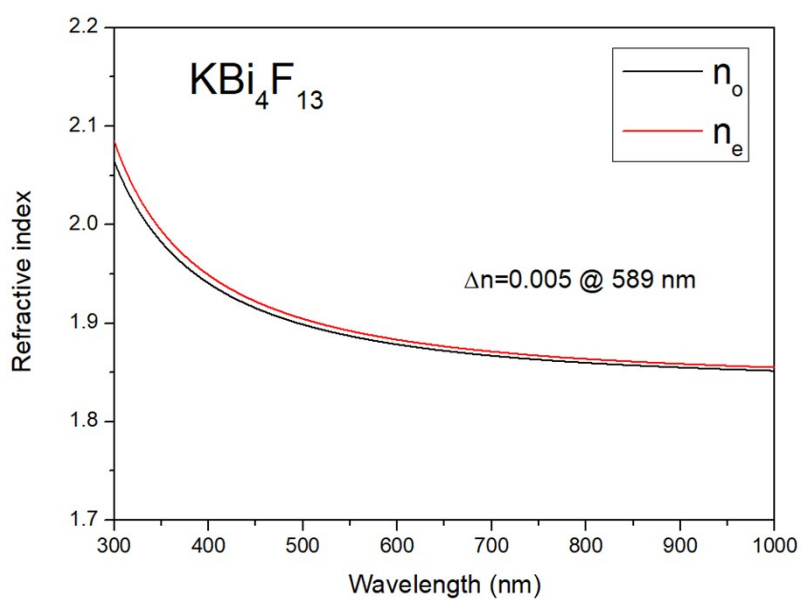

**Fig. S4** The simulated refractive index of  $\text{KBi}_4\text{F}_{13}$
